# Supplementary material
Source: PubMed Central journal article supplement (PMC2706454)
Supplement: rsif20071345s07.pdf [file rsif20071345s07.pdf]

# Supplementary material

## Studying the effect of cell division on expression patterns of the segment polarity genes

M. Chaves and R. Albert

### 1 Proof of Theorems 1 and 2

As mentioned in the main text, the proofs are similar to those given in [1], with appropriate index changes. For easier reference and completeness, we provide the proofs next. First, some observations regarding the solutions of system (1):

$$\frac{d\hat{X}_\ell}{dt} = \alpha_\ell(-\hat{X}_\ell + F_\ell(X_1, X_2, \dots, X_N)), \quad \ell = 1, \dots, N, \quad (1)$$

Let  $X$  denote any of the nodes in the network, and  $\alpha$  its time rate. Since equations (1) are either of the form  $d\hat{X}/dt = \alpha(-\hat{X} + 1)$  or  $d\hat{X}/dt = -\alpha\hat{X}$ , their solutions are continuous functions, piecewise combinations of:

$$\hat{X}^1(t) = 1 - (1 - \hat{X}^1(t_0)) e^{-\alpha(t-t_0)} \quad (2)$$

$$\hat{X}^0(t) = \hat{X}^0(t_0) e^{-\alpha(t-t_0)} \quad (3)$$

$\hat{X}^1(t)$  (resp.  $\hat{X}^0(t)$ ) is monotonically increasing (resp. decreasing). In addition, note that discrete variables  $X$  can only switch between 0 and 1 at those instants when  $\hat{X}(t_{\text{switch}}) = \theta$ , that is:

$$t_{\text{switch}}^1 = t_0 + \frac{1}{\alpha} \ln \frac{(1 - \hat{X}(t_0))}{1 - \theta} \quad (4)$$

$$t_{\text{switch}}^0 = t_0 + \frac{1}{\alpha} \ln \frac{\hat{X}(t_0)}{\theta} \quad (5)$$

From Proposition 6.1 of the main text we can immediately conclude:

$$\widehat{wg}_{1, \dots, \text{FS}-1}(t) = \widehat{\text{WG}}_{1,2}(t) = 0, \quad (6)$$

$$\widehat{en}_{\text{FS}, \dots, \text{LS}}(t) = \widehat{\text{EN}}_{\text{FS}, \dots, \text{LS}}(t) = 0,$$

$$\widehat{hh}_{\text{FS}, \dots, \text{LS}}(t) = \widehat{\text{HH}}_{\text{FS}, \dots, \text{LS}}(t) = 0, \quad (7)$$

$$\widehat{ci}_{\text{FS}, \dots, \text{LS}}(t) = 1 \text{ and } \widehat{\text{CI}}_{\text{FS}, \dots, \text{LS}}(t) = 1 - e^{-\alpha_{\text{CI}_{\text{FS}, \dots, \text{LS}}} t}. \quad (8)$$

**Lemma 1.1.** Let  $0 \leq t_0 < t_3 \leq t_1$  and  $0 \leq t_2 < t_3$ . Define  $\delta = \ln \frac{1}{1-\theta} / \max_{1, \dots, N} \alpha_i$ . Assume  $\text{CIA}_{\text{FS}}(t) = 0$  for  $t \in (t_2, t_3)$ , and  $wg_{\text{FS}}(t) = 0$  for  $t \in [0, t_3)$ . Then

- (a)  $wg_{\text{FS}}(t) = 0$  for  $t \in [0, t_3 + \delta)$ ;
- (b)  $\text{WG}_{\text{FS}}(t) = 0$  for  $t \in [0, t_3 + \delta)$ ;
- (c)  $en_{\text{FS}-1}(t) = \text{EN}_{\text{FS}-1}(t) = 0$  for  $t \in [0, t_3 + \delta)$ ;
- (d)  $hh_{\text{FS}-1}(t) = \text{HH}_{\text{FS}-1}(t) = 0$  for  $t \in [0, t_3 + \delta)$ .

Assume further that  $\text{PTC}_{\text{FS}}(t) = 1$  for  $t \in (t_0, t_1)$ . Then

(e)  $\text{PTC}_{\text{FS}}(t) = 1$  for all  $t \in (t_0, t_3 + \delta)$ .

(f)  $\text{CIA}_{\text{FS}}(t) = 0$  for all  $t \in (t_2, t_3 + \delta)$ .

*Proof:* Part (a) follows directly from the fact that  $F_{\text{wg}_{\text{FS}}}(t) = 0$  on  $[0, t_3]$ , and from (4).

To prove parts (b), (c), and (d), first note that initial conditions together with  $\text{wg}_{\text{FS}}(t) = 0$  for  $t \in [0, t_3]$  imply

$$\widehat{\text{WG}}_{\text{FS}}(t) = 0, \widehat{e}\widehat{n}_{\text{FS}-1}(t) = \widehat{\text{EN}}_{\text{FS}-1}(t) = 0, \widehat{h}\widehat{h}_{\text{FS}-1}(t) = \widehat{\text{HH}}_{\text{FS}-1}(t) = 0,$$

for  $t \in [0, t_3]$ . Then, from equations (2) to (5) we conclude that the corresponding discrete variables cannot switch from 0 to 1 during an interval of the form  $[0, t_3 + \frac{1}{\alpha_j} \ln \frac{1}{1-\theta})$ . Taking the largest common interval yields the desired results.

To prove parts (e) and (f), assume also that  $\text{PTC}_{\text{FS}}(t) = 1$  for  $t \in (t_0, t_1)$ . From (7) and part (d), it follows that function  $F_{\text{PTC}_{\text{FS}}}$  does not switch in the interval  $(t_0, t_3 + \delta)$  and in fact  $\text{PTC}_{\text{FS}}(t) = 1$  for all  $t$  in this interval. This, together with (7) and part (d) yield  $F_{\text{CIA}_{\text{FS}}}(t) = 0$  for  $(t_0, t_3 + \delta)$ , so that  $\widehat{\text{CIA}}_{\text{FS}}$  cannot increase in this interval and the discrete level satisfies  $\text{CIA}_{\text{FS}}(t) = 0$  for all  $t \in (t_2, t_3 + \delta)$ , as we wanted to show. ■

**Corollary 1.2.** Let  $0 \leq t_0 < t_3 \leq t_1$  and  $0 \leq t_2 < t_3$ . If  $\text{PTC}_{\text{FS}}(t) = 1$  for  $t \in (t_0, t_1)$ ,  $\text{CIA}_{\text{FS}}(t) = 0$  for  $t \in (t_2, t_3)$ , and  $\text{wg}_{\text{FS}}(t) = 0$  for  $t \in [0, t_3]$ , then  $\text{wg}_{\text{FS}}(t) = 0$  for all  $t$ .

*Proof:* Applying Lemma 1.1 we conclude that, given any  $k \geq 0$ :

$$\begin{aligned} \text{CIA}_{\text{FS}}(t) &= 0, \text{ for } t \in (t_2, t_3 + k\delta) \\ \text{wg}_{\text{FS}}(t) &= 0, \text{ for } t \in [0, t_3 + k\delta) \\ \text{PTC}_{\text{FS}}(t) &= 1 \text{ for } t \in (t_0, t_3 + k\delta) \end{aligned}$$

imply

$$\begin{aligned} \text{CIA}_{\text{FS}}(t) &= 0, \text{ for } t \in (t_2, t_3 + (k+1)\delta) \\ \text{wg}_{\text{FS}}(t) &= 0, \text{ for } t \in [0, t_3 + (k+1)\delta) \\ \text{PTC}_{\text{FS}}(t) &= 1 \text{ for } t \in (t_0, t_3 + (k+1)\delta). \end{aligned}$$

Since  $\delta$  is finite, we conclude by induction on  $k$  that  $\text{wg}_{\text{FS}}(t) = 0$  for all  $t$ . ■

*Proof of Theorem 1:* The rule for  $\text{CIA}_{\text{FS}}$  may be simplified to (by (7))

$$F_{\text{CIA}_{\text{FS}}} = \text{CI}_{\text{FS}} \text{ and } [\text{notPTC}_{\text{FS}} \text{ or } \text{hh}_{\text{FS}-1} \text{ or } \text{HH}_{\text{FS}-1}].$$

From equation (8), we have that

$$\text{CI}_{\text{FS}}(t) = 1, \text{ for all } t > \frac{1}{\alpha_{\text{CI}_{\text{FS}}}} \ln \frac{1}{1-\theta}. \quad (9)$$

On the other hand, since  $\text{ptc}_{\text{FS}}(0) = 1$ , by continuity of solutions  $\text{ptc}_{\text{FS}}(t) = 1$  for all  $t < \frac{1}{\alpha_{\text{ptc}_{\text{FS}}}} \ln \frac{1}{\theta}$ . This implies that the Patched protein satisfies

$$\widehat{\text{PTC}}_{\text{FS}}(t) = 1 - e^{-\alpha_{\text{PTC}_{\text{FS}}} t}, \quad 0 \leq t \leq \frac{1}{\alpha_{\text{ptc}_{\text{FS}}}} \ln \frac{1}{\theta}$$

and therefore

$$\text{PTC}_{\text{FS}}(t) = \begin{cases} 0, & 0 \leq t \leq \frac{1}{\alpha_{\text{PTC}_{\text{FS}}}} \ln \frac{1}{1-\theta} \\ 1, & \frac{1}{\alpha_{\text{PTC}_{\text{FS}}}} \ln \frac{1}{1-\theta} < t < \frac{1}{\alpha_{\text{ptc}_{\text{FS}}}} \ln \frac{1}{\theta}. \end{cases} \quad (10)$$

By assumption,  $\alpha_{\text{PTC}_{\text{FS}}} > \alpha_{\text{ptc}_{\text{FS}}}$  and also  $\ln \frac{1}{1-\theta} \leq \ln \frac{1}{\theta}$ , defining a nonempty interval where  $\text{PTC}_{\text{FS}}$  is expressed. Now let  $t_c = \frac{1}{\alpha_{\text{CIA}_{\text{FS}}}} \ln \frac{1}{1-\theta}$  and  $t_p = \frac{1}{\alpha_{\text{PTC}_{\text{FS}}}} \ln \frac{1}{1-\theta}$ .  $\widehat{\text{CIA}}_{\text{FS}}(t)$  starts at zero and must remain so while  $\text{CIA}_{\text{FS}} = 0$ , so that

$$\text{CIA}_{\text{FS}}(t) = 0 \text{ for } 0 < t < t_c.$$

In the case  $t_c > t_p$ , letting  $t_0 = t_p$ ,  $t_1 = \frac{1}{\alpha_{\text{ptc}_{\text{FS}}}} \ln \frac{1}{\theta}$ ,  $t_2 = 0$ , and  $t_3 = t_c$  in Corollary 1.2, obtains  $w_{\text{g}_{\text{FS}}}(t) = 0$  for all  $t$ . This proves item (b) of the theorem, and part of (a).

To finish the proof of item (a), we assume that  $(1-\theta)^2 < \theta$  and must now consider the case  $t_c \leq t_p$ . Then

$$\widehat{\text{CIA}}_{\text{FS}}(t) = \begin{cases} 0, & 0 \leq t \leq t_c \\ 1 - e^{-\alpha_{\text{CIA}_{\text{FS}}}(t-t_c)}, & t_c < t \leq t_p \\ \widehat{\text{CIA}}_{\text{FS}}(t_p) e^{-\alpha_{\text{CIA}_{\text{FS}}}(t-t_p)}, & t_p < t \leq \frac{1}{\alpha_{\text{ptc}_{\text{FS}}}} \ln \frac{1}{\theta}, \end{cases}$$

Following equation (4) with  $t_0 = t_c$  and  $\widehat{\text{CIA}}_{\text{FS}}(t_0) = 0$ ,  $\text{CIA}_{\text{FS}}$  might become expressed at time  $t_c < t_a < t_p$ :

$$t_a = t_c + \frac{1}{\alpha_{\text{CIA}_{\text{FS}}}} \ln \frac{1}{1-\theta},$$

but it would then become zero again at (equation (5) with  $t_0 = t_p$ )

$$t_b = t_p + \frac{1}{\alpha_{\text{CIA}_{\text{FS}}}} \ln \frac{\widehat{\text{CIA}}_{\text{FS}}(t_p)}{\theta}.$$

Finally, we show that, even if  $\text{CIA}_{\text{FS}}(t) = 1$  for  $t \in (t_a, t_b)$ ,  $w_{\text{g}_{\text{FS}}}$  cannot become expressed in this interval. In this interval,  $\widehat{w}_{\text{g}_{\text{FS}}}$  evolves according to  $\widehat{w}_{\text{g}_{\text{FS}}}(t) = 1 - e^{-\alpha_{\text{wg}_{\text{FS}}}(t-t_a)}$ , and  $w_{\text{g}_{\text{FS}}}$  can switch to 1 at time

$$t_w = t_a + \frac{1}{\alpha_{\text{wg}_{\text{FS}}}} \ln \frac{1}{1-\theta}.$$

We will show that  $t_w > t_b$ , so  $w_{\text{g}_{\text{FS}}}(t) = 0$  in the interval  $[0, t_b)$ . Writing

$$\ln \frac{\widehat{\text{CIA}}_{\text{FS}}(t_p)}{\theta} = \ln \frac{\widehat{\text{CIA}}_{\text{FS}}(t_p)}{1-\theta} \frac{1-\theta}{\theta} = \ln \frac{\widehat{\text{CIA}}_{\text{FS}}(t_p)}{1-\theta} + \ln \frac{1-\theta}{\theta} \leq \ln \frac{1}{1-\theta} + \ln \frac{1}{1-\theta}$$

where we have used  $\widehat{\text{CIA}}_{\text{FS}}(t_p) \leq 1$  and the assumption on  $\theta$ :  $\frac{1-\theta}{\theta} \leq \frac{1}{1-\theta}$ . Therefore

$$t_b \leq t_p + \frac{2}{\alpha_{\text{CIA}_{\text{FS}}}} \ln \frac{1}{1-\theta} < \frac{1}{\alpha_{\text{wg}_{\text{FS}}}} \ln \frac{1}{1-\theta} + \frac{1}{\alpha_{\text{CIA}_{\text{FS}}}} \ln \frac{1}{1-\theta} < t_w$$

where we have used the timescale separation assumption (A1). Letting  $t_0 = t_p$ ,  $t_2 = 0$ , and  $t_1 = t_3 = \min\{t_b, \alpha_{\text{ptc}_{\text{FS}}}^{-1} \ln \frac{1}{\theta}\}$  in the Corollary, obtains  $w_{\text{g}_{\text{FS}}}(t) = 0$  for all  $t$ . ■

We will next show that if  $w_{\text{g}_{\text{LS}}}(t) = 1$  in a given interval  $[0, T)$ , then in fact  $w_{\text{g}_{\text{LS}}}(t)$  remains expressed for a longer time, up to  $T + \delta$ , with  $\delta > 0$ . This is mainly due to assumption (A1), which says that mRNAs take longer than proteins to update their discrete values, because they have longer half-lives:  $\alpha_{\text{mRNA}}^{-1} > \alpha_{\text{prot}}^{-1}$ . This allows the initial signal “ $w_{\text{g}_{\text{LS}}} = 1$ ” to travel down the network, sequentially affecting the wingless protein, *engrailed*, *hedgehog* and CIA, and feed back into *wingless* allowing  $w_{\text{g}_{\text{LS}}}$  to remain expressed for a further time interval.

**Lemma 1.3.** Let  $T \geq \frac{1}{\alpha_{\text{wg}_{\text{LS}}}} \ln \frac{1}{\theta}$  and define

$$\delta = \frac{1}{\alpha_{\text{wg}_{\text{LS}}}} \ln \left( \frac{1 - e^{-\frac{\alpha_{\text{wg}_{\text{LS}}}}{\alpha_{\text{wg}_{\text{LS}}}} \ln \frac{1}{\theta}}}{\theta} \right). \quad (11)$$

If  $w_{\text{g}_{\text{LS}}}(t) = 1$  for  $0 \leq t < T$ , then

- (a)  $\text{WG}_{\text{LS}}(t) = 1$  for  $t \in (\frac{1}{\alpha_{\text{WG}_{\text{LS}}}} \ln \frac{1}{1-\theta}, T + \delta)$ ;
- (b)  $en_1(t) = 1$  for  $t \in [0, T + \delta)$ ;
- (c)  $\widehat{\text{EN}}_1(t) = 1 - e^{-\alpha_{\text{EN}_1} t}$  for  $t \in [0, T + \delta)$ , and  $\text{EN}_1(t) = 1$  for  $(\frac{1}{\alpha_{\text{EN}_1}} \ln \frac{1}{1-\theta}, T + \delta)$ ;
- (d)  $ci_1(t) = 0$ ,  $\text{CI}_1(t) = 0$ ,  $\text{CIA}_1(t) = 0$ , and  $\text{CIR}_1(t) = 0$  for  $t \in [0, T + \delta)$ ;
- (e)  $hh_1(t) = 1$ , for  $t \in [0, T + \delta)$ ;
- (f)  $\text{CIA}_{\text{LS}}(t) = 1$ , for  $t \in (\frac{1}{\alpha_{\text{CI}_{\text{LS}}}} \ln \frac{1}{1-\theta} + \frac{1}{\alpha_{\text{CIA}_{\text{LS}}}} \ln \frac{1}{1-\theta}, T + \delta)$ , and  $\text{CIR}_{\text{LS}}(t) = 0$ , for  $t \in [0, T + \delta)$ ;
- (g)  $wg_{\text{LS}}(t) = 1$  for  $t \in [0, T + \delta)$ .

*Proof:* Let  $T \geq \frac{1}{\alpha_{\text{WG}_{\text{LS}}}} \ln \frac{1}{\theta}$ , and assume that  $wg_{\text{LS}}(t) = 1$  for  $0 \leq t < T$ . To prove part (a), note that  $\widehat{\text{WG}}_{\text{LS}}(t)$  is of the form (2) (with  $t_0 = 0$ , and  $\widehat{\text{WG}}_{\text{LS}}(0) = 0$ ) and the corresponding discrete variable is  $\text{WG}_{\text{LS}}(t) = 1$ , for  $t \in (\frac{1}{\alpha_{\text{WG}_{\text{LS}}}} \ln \frac{1}{1-\theta}, T)$ . Moreover, suppose that  $wg_{\text{LS}}(t) = 0$  for  $t > T$ , then

$$\widehat{\text{WG}}_{\text{LS}}(t) = (1 - e^{-\alpha_{\text{WG}_{\text{LS}}} T}) e^{-\alpha_{\text{WG}_{\text{LS}}}(t-T)}, \quad t > T.$$

But  $\text{WG}_{\text{LS}}$  remains 1 until the switching threshold is attained, that is up to time

$$T + \frac{1}{\alpha_{\text{WG}_{\text{LS}}}} \ln \frac{(1 - e^{-\alpha_{\text{WG}_{\text{LS}}} T})}{\theta} \geq T + \frac{1}{\alpha_{\text{WG}_{\text{LS}}}} \ln \frac{(1 - e^{-\alpha_{\text{WG}_{\text{LS}}} \frac{1}{\alpha_{\text{WG}_{\text{LS}}} \ln \frac{1}{\theta}}})}{\theta} \equiv T + \delta.$$

Thus we conclude that  $\text{WG}_{\text{LS}}(t) = 1$  in the desired interval.

To prove part (b), observe that  $F_{en_1}(t) = \text{WG}_{\text{LS}}(t)$  for all  $t$ , from (6), and recall that  $en_1(0) = 1$ . From part (a),  $F_{en_1}(t) = 1$  for  $t \in (\frac{1}{\alpha_{\text{WG}_{\text{LS}}}} \ln \frac{1}{1-\theta}, T + \delta)$ . On the other hand,  $en_1$  can only switch from 1 to 0 at  $t = \alpha_{en_1}^{-1} \ln \frac{1}{\theta}$  which is larger than  $\alpha_{\text{WG}_{\text{LS}}}^{-1} \ln \frac{1}{1-\theta}$ . So, in fact,  $en_1(t) = 1$  for all  $0 \leq t < T + \delta$ .

Part (c) follows immediately by integration of the  $\widehat{\text{EN}}_1$  equation.

To prove part (d), first recall  $F_{ci_1} = \text{not EN}_1$  and the initial conditions  $ci_1(0) = 0 = \text{CI}_1(0) = \text{CIA}_1(0) = \text{CIR}_1(0)$ . Therefore  $\widehat{ci}_1(t)$  increases up to  $t = \frac{1}{\alpha_{\text{EN}_1}} \ln \frac{1}{1-\theta}$  and then decreases in  $\alpha_{\text{EN}_1}^{-1} \ln \frac{1}{1-\theta} < t < T + \delta$ . Now note that the discrete variable  $ci_1(t)$  remains 0 in the whole interval  $[0, T + \delta)$ . This is because  $\widehat{ci}_1$  never reaches the  $\theta$  threshold: this would be attained at some  $t \geq \alpha_{ci_1}^{-1} \ln \frac{1}{1-\theta}$  but, since  $\alpha_{ci_1}^{-1} \ln \frac{1}{1-\theta} > \alpha_{\text{EN}_1}^{-1} \ln \frac{1}{1-\theta}$ , the function  $\widehat{ci}_1$  starts decreasing before it could reach the value  $\theta$ . Finally, from the rules of the Cubitus proteins it is immediate to see that  $\text{CI}_1(t) = \text{CIA}_1(t) = \text{CIR}_1(t) = 0$  for  $t \in [0, T + \delta)$ .

To prove part (e), recall that  $F_{hh_1} = \text{EN}_1$  and not  $\text{CIR}_1$ . From part (a), it follows that  $F_{hh_1}(t) = 0$  in the interval  $[0, \alpha_{\text{EN}_1}^{-1} \ln \frac{1}{1-\theta})$  and  $F_{hh_1}(t) = 1$  in the interval  $(\alpha_{\text{EN}_1}^{-1} \ln \frac{1}{1-\theta}, T + \delta)$ . Since  $hh_1(0) = 1$ ,  $\widehat{hh}_1(t)$  decreases in the interval  $[0, \alpha_{\text{EN}_1}^{-1} \ln \frac{1}{1-\theta})$  but increases in  $(\alpha_{\text{EN}_1}^{-1} \ln \frac{1}{1-\theta}, T + \delta)$ . The discrete value is  $hh_1(t) = 1$  in the whole interval, since  $\widehat{hh}_1(t)$  remains above the  $\theta$  threshold. (The justification is similar to the case of  $ci_1(t)$  in part (d).)

To prove part (f), note that part (e) and then the use of (8), allows us to simplify  $F_{\text{CIA}_{\text{LS}}}$ :

$$F_{\text{CIA}_{\text{LS}}}(t) = \text{CI}_{\text{LS}}(t) \text{ and } hh_1(t) = 1, \quad t \in \left( \frac{1}{\alpha_{\text{CI}_{\text{LS}}}} \ln \frac{1}{1-\theta}, T + \delta \right).$$

Thus

$$\widehat{\text{CIA}}_{\text{LS}}(t) = \begin{cases} 0, & 0 \leq t \leq \frac{1}{\alpha_{\text{CI}_{\text{LS}}}} \ln \frac{1}{1-\theta} \\ 1 - e^{-\alpha_{\text{CIA}_{\text{LS}}}(t - \frac{1}{\alpha_{\text{CI}_{\text{LS}}}} \ln \frac{1}{1-\theta})}, & \frac{1}{\alpha_{\text{CI}_{\text{LS}}}} \ln \frac{1}{1-\theta} < t \leq T + \delta, \end{cases}$$

and  $\text{CIA}_{\text{LS}}(t) = 1$  for  $t \in [\frac{1}{\alpha_{\text{CI}_{\text{LS}}}} \ln \frac{1}{1-\theta} + \frac{1}{\alpha_{\text{CIA}_{\text{LS}}}} \ln \frac{1}{1-\theta}, T + \delta)$ . Observe that this interval is indeed nonempty, by assumption (A1). Finally,  $F_{\text{CIR}_{\text{LS}}}(t) = \text{CI}_{\text{LS}}(t)$  and  $\text{noth}h_1(t) = 0$ , and hence  $\text{CIR}_{\text{LS}}(t) = 0$  for  $t \in [0, T + \delta)$ .

To prove part (g), we note that (from part (f))

$$F_{w_{\text{g}_{\text{LS}}}}(t) = 1, \quad t \in \left( \frac{1}{\alpha_{\text{CI}_{\text{LS}}}} \ln \frac{1}{1-\theta} + \frac{1}{\alpha_{\text{CIA}_{\text{LS}}}} \ln \frac{1}{1-\theta}, T + \delta \right),$$

implying that  $\widehat{w}_{\text{g}_{\text{LS}}}(t)$  increases in this interval. On the other hand, we know that  $\widehat{w}_{\text{g}_{\text{LS}}}(t) \geq \theta$  and  $w_{\text{g}_{\text{LS}}}(t) = 1$  up to at least  $t = \frac{1}{\alpha_{w_{\text{g}_{\text{LS}}}}} \ln \frac{1}{\theta} > \frac{1}{\alpha_{\text{CI}_{\text{LS}}}} \ln \frac{1}{1-\theta} + \frac{1}{\alpha_{\text{CIA}_{\text{LS}}}} \ln \frac{1}{1-\theta}$ . This shows that in fact  $w_{\text{g}_{\text{LS}}}(t) = 1$  for all  $t \in [0, T + \delta)$ . ■

*Proof of Theorem 2:* Since  $w_{\text{g}_{\text{LS}}}(0) = 1$ , from equations (4), (5), we know that the earliest possible switching time from 1 to 0 is  $\alpha_{w_{\text{g}_{\text{LS}}}}^{-1} \ln \frac{1}{\theta}$ . Applying Lemma 1.3 with  $T = \alpha_{w_{\text{g}_{\text{LS}}}}^{-1} \ln \frac{1}{\theta}$  establishes that  $w_{\text{g}_{\text{LS}}}(t) = 1$  for  $t \in [0, T + \delta)$ , with  $\delta$  given by (11). Next, applying Lemma 1.3 with  $T = \alpha_{w_{\text{g}_{\text{LS}}}}^{-1} \ln \frac{1}{\theta} + k\delta$ ,  $k \in \mathbb{N}$ , shows that  $w_{\text{g}_{\text{LS}}}(t) = 1$  for  $t \in [0, T + (k + 1)\delta)$ . Since  $\delta$  is finite, we can conclude by induction that  $w_{\text{g}_{\text{LS}}}(t) = 1$  for all  $t \geq 0$ .

To prove that  $\text{PTC}_1(t) \equiv 0$ , note that  $\text{CIA}_1(t) \equiv 0$  (Lemma 1.3, with  $T = +\infty$ ) implies  $\text{ptc}_1(t) \equiv 0$ . Since  $\text{PTC}_1(0) = 0$  and  $\text{PTC}_1$  cannot become expressed unless  $\text{ptc}_1$  is first expressed, the desired result follows. ■

## References

- [1] M. Chaves, E.D. Sontag, and R. Albert. Methods of robustness analysis for boolean models of gene control networks. *IEE Proc. Syst. Biol.*, 153:154–167, 2006.
